# Supplementary material for: Self-assembly of an amino acid derivative as an anode interface layer for advanced alkaline Al–air batteries
Source: Royal Society of Chemistry journal article supplement (doi:10.1039/d3cp05767d), 2024-01-01
Supplement: d3cp05767d1.pdf [file d3cp05767d1.pdf]

## Supporting Information

### Self-assembly of an amino acid derivative as anode interface layer for advanced alkaline Al-air batteries

Lei Guo<sup>\*a,b,c</sup>, Lei Zhu<sup>a,c</sup>, Yue Huang<sup>d</sup>, Yan Tan<sup>a,c</sup>, Alessandra Gilda Ritacca<sup>e,f</sup>, Xingwen Zheng<sup>g</sup>,  
Senlin Leng<sup>a,c</sup> and Baoguo Wang<sup>b</sup>

<sup>a</sup> School of Material and Chemical Engineering, Tongren University, Tongren 554300, China

E-mail: chygl@gztrc.edu.cn

<sup>b</sup> Department of Chemical Engineering, Tsinghua University, Beijing 100084, China

<sup>c</sup> Guizhou Provincial Key Laboratory for Cathode Materials of New Energy Battery, Tongren 554300, China

<sup>d</sup> College of Materials and Metallurgy, Guizhou University, Guiyang 550025, China

<sup>e</sup> Department of Life and Environmental Sciences, Polytechnic University of Marche, Via Breccie Bianche, 60131, Ancona, Italy

<sup>f</sup> Center for Synaptic Neuroscience and Technology, Istituto Italiano di Tecnologia, 16132 Genova, Italy

<sup>g</sup> Key Laboratory of Material Corrosion and Protection of Sichuan Province, Sichuan University of Science and Engineering, Zigong 643000, China

#### Supplementary Figures

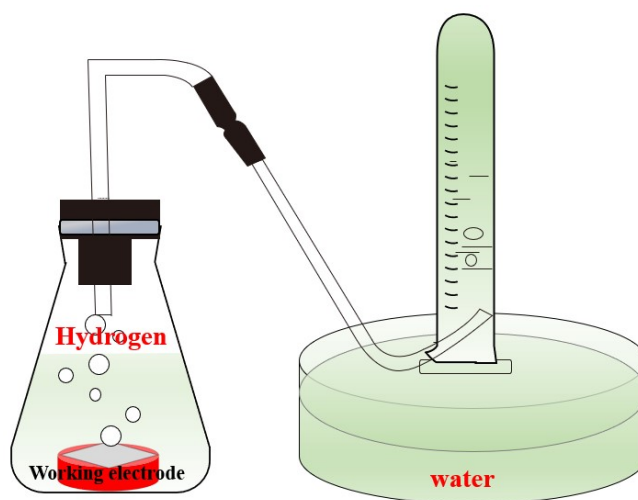

Fig. S1 Diagram of hydrogen collection device by drainage method.

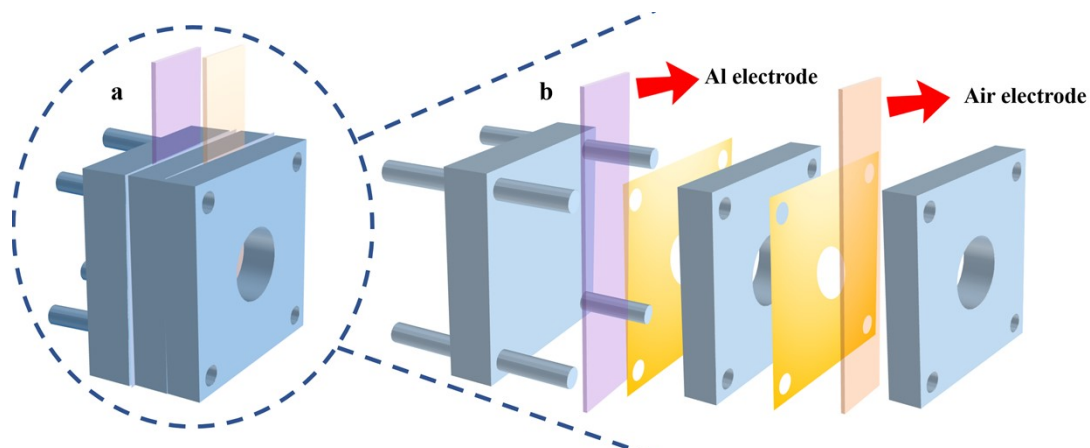

**Fig. S2** Diagrams of (a) an integrated Al-air battery device and (b) dismantled components.

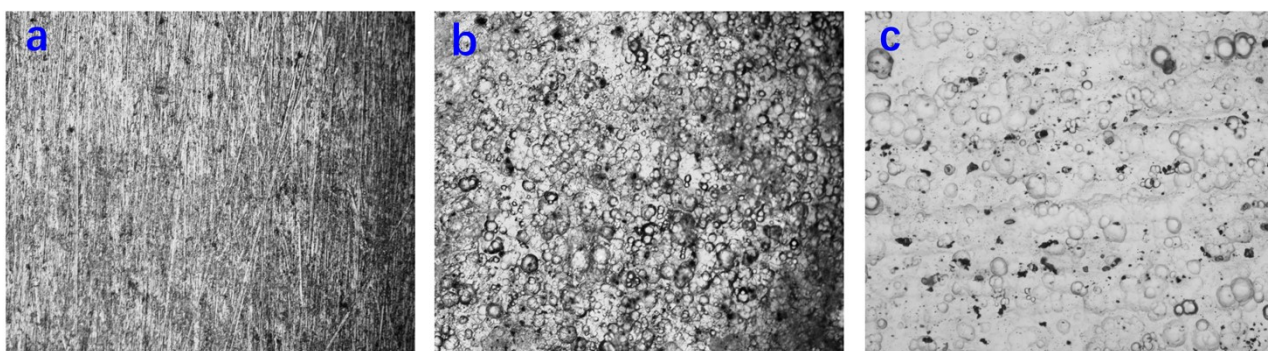

**Fig. S3** Metallographic microscope images of Al under different treating conditions: (a) as-polished, (b) blank, (c) 4 M NaOH + 1.5 mM NBLT.

### ***Quantum Chemical Calculations***

The adsorption energy of adsorbate molecule on the metal slab, namely  $E_{\text{ads}}$ , was calculate by the following formula:<sup>1</sup>

$$E_{\text{ads}} = E_{\text{mol/slab}} - (E_{\text{mol}} + E_{\text{slab}}) \quad (1)$$

where  $E_{\text{mol/slab}}$  is the total energies of adsorbate molecules on slab model,  $E_{\text{inh}}$  is the total energy of isolated adsorbate molecule,  $E_{\text{slab}}$  is the total energy of the metal slab.

The charge density difference ( $\Delta\rho$ ) is determined by the electron densities of the whole adsorption system ( $\rho_{\text{mol/surf}}(r)$ ), the isolated adsorbate molecules ( $\rho_{\text{mol}}(r)$ ) and the clean Al(111) surface ( $\rho_{\text{surf}}(r)$ ):<sup>2</sup>

$$\Delta\rho = \rho_{\text{mol/surf}}(r) - \rho_{\text{mol}}(r) - \rho_{\text{surf}}(r) \quad (2)$$

### ***References***

- 1 C. Gattinoni and A. Michaelides, *Faraday Discuss.*, 2015, **180**, 439-458.

2 S. B. Liu, *Acta Phys. Chim. Sin.*, 2009, **25**, 590-600.
